# Supplementary material for: Gustilo IIIB型下腿骨開放骨折に対する治療 : 早期軟部組織修復の重要性について
Source: Hindawi journal article supplement (doi:10.1155/2014/878704), 2004-03-01
Supplement: f1 [file 878704.f1.pdf]

1

**Supplemental Materials**2 Table S1. Summary of field blank values ( $\mu\text{g}/\text{m}^3$ ) for each of chemical compounds.

| Chemical species              | Field blanks ( $\mu\text{g}/\text{m}^3$ ) |
|-------------------------------|-------------------------------------------|
| OC                            | 0.4837 ( $\pm$ 0.0244)                    |
| EC                            | 0.0090 ( $\pm$ 0.0022)                    |
| SO <sub>4</sub> <sup>2-</sup> | 1.7088 ( $\pm$ 0.2049)                    |
| NO <sub>3</sub> <sup>-</sup>  | 1.8571 ( $\pm$ 0.0496)                    |
| Cl <sup>-</sup>               | 0.7626 ( $\pm$ 0.0228)                    |
| NH <sub>4</sub> <sup>+</sup>  | 0.1145 ( $\pm$ 0.0378)                    |
| Na <sup>+</sup>               | 0.0000 ( $\pm$ 0.0315)                    |
| K <sup>+</sup>                | 0.0000 ( $\pm$ 0.0166)                    |
| Na                            | 0.0226 ( $\pm$ 0.0070)                    |
| Mg                            | 0.0096 ( $\pm$ 0.0017)                    |
| Al                            | 0.0049 ( $\pm$ 0.0013)                    |
| Si                            | 0.0065 ( $\pm$ 0.0029)                    |
| P                             | 0.0019 ( $\pm$ 0.0005)                    |
| S                             | 0.0118 ( $\pm$ 0.0095)                    |
| Cl                            | 0.0051 ( $\pm$ 0.0046)                    |
| K                             | 0.0017 ( $\pm$ 0.0010)                    |
| Ca                            | 0.0082 ( $\pm$ 0.0041)                    |
| Ti                            | 0.0004 ( $\pm$ 0.0001)                    |
| V                             | 0.0001 ( $\pm$ 0.0000)                    |
| Cr                            | 0.0004 ( $\pm$ 0.0001)                    |
| Mn                            | 0.0008 ( $\pm$ 0.0002)                    |
| Fe                            | 0.0024 ( $\pm$ 0.0013)                    |
| Co                            | 0.0000 ( $\pm$ 0.0000)                    |
| Ni                            | 0.0005 ( $\pm$ 0.0001)                    |
| Cu                            | 0.0005 ( $\pm$ 0.0002)                    |
| Zn                            | 0.0014 ( $\pm$ 0.0004)                    |
| Br                            | 0.0004 ( $\pm$ 0.0002)                    |
| Sr                            | 0.0005 ( $\pm$ 0.0001)                    |
| Pb                            | 0.0012 ( $\pm$ 0.0002)                    |

3 Table S2. Annual average concentrations of inorganic water soluble ions across eleven  
 4 sites (unit: microgram per cubic meter).

| Site         |      | PM <sub>2.5</sub> mass | SO <sub>4</sub> <sup>2-</sup> | NO <sub>3</sub> <sup>-</sup> | Cl <sup>-</sup> | NH <sub>4</sub> <sup>+</sup> | Na <sup>+</sup> | K <sup>+</sup> |
|--------------|------|------------------------|-------------------------------|------------------------------|-----------------|------------------------------|-----------------|----------------|
| All Sites    | Min  | 5.64                   | N.D                           | N.D                          | N.D             | 0.01                         | N.D             | N.D            |
|              | Mean | 28.66                  | 4.65                          | 1.06                         | 0.23            | 1.83                         | 0.33            | 0.09           |
|              | Std  | 17.75                  | 2.58                          | 0.87                         | 0.29            | 1.03                         | 0.29            | 0.09           |
|              | Max  | 161.97                 | 14.93                         | 8.14                         | 2.78            | 6.79                         | 3.09            | 1.22           |
| E. Jerusalem | Min  | 9.72                   | 0.88                          | 0.18                         | N.D             | 0.33                         | N.D             | N.D            |
|              | Mean | 26.84                  | 4.45                          | 0.98                         | 0.20            | 1.78                         | 0.25            | 0.08           |
|              | Std  | 17.10                  | 2.42                          | 0.67                         | 0.16            | 0.93                         | 0.22            | 0.10           |
|              | Max  | 117.92                 | 10.71                         | 3.58                         | 0.60            | 4.07                         | 1.00            | 0.68           |
| Hebron       | Min  | 8.10                   | 1.09                          | 0.22                         | 0.04            | 0.37                         | N.D             | N.D            |
|              | Mean | 23.06                  | 3.98                          | 0.93                         | 0.22            | 1.67                         | 0.26            | 0.08           |
|              | Std  | 10.85                  | 2.35                          | 0.55                         | 0.17            | 0.90                         | 0.22            | 0.07           |
|              | Max  | 64.99                  | 12.99                         | 3.20                         | 0.78            | 4.26                         | 0.86            | 0.32           |
| Nablus       | Min  | 13.29                  | 0.98                          | 0.39                         | 0.01            | 0.32                         | 0.01            | 0.02           |
|              | Mean | 30.89                  | 4.44                          | 1.08                         | 0.25            | 1.69                         | 0.30            | 0.11           |
|              | Std  | 12.43                  | 2.49                          | 0.67                         | 0.20            | 0.92                         | 0.22            | 0.06           |
|              | Max  | 85.13                  | 10.99                         | 3.73                         | 0.78            | 3.98                         | 0.99            | 0.31           |
| Aqaba        | Min  | 10.33                  | 0.77                          | 0.15                         | N.D             | 0.01                         | N.D             | N.D            |
|              | Mean | 25.37                  | 3.81                          | 0.90                         | 0.17            | 1.42                         | 0.35            | 0.08           |
|              | Std  | 16.48                  | 1.57                          | 0.53                         | 0.23            | 0.75                         | 0.25            | 0.05           |
|              | Max  | 114.16                 | 7.69                          | 3.38                         | 1.27            | 4.28                         | 1.06            | 0.25           |
| Rahma        | Min  | 8.34                   | 0.93                          | 0.23                         | 0.02            | 0.31                         | 0.01            | 0.02           |
|              | Mean | 24.98                  | 4.13                          | 0.87                         | 0.14            | 1.63                         | 0.29            | 0.11           |
|              | Std  | 18.73                  | 2.07                          | 0.58                         | 0.15            | 0.89                         | 0.19            | 0.06           |
|              | Max  | 131.97                 | 11.48                         | 2.95                         | 0.61            | 4.31                         | 0.83            | 0.27           |
| Amman        | Min  | 12.37                  | 1.64                          | 0.33                         | N.D             | 0.62                         | N.D             | N.D            |
|              | Mean | 40.29                  | 4.93                          | 1.19                         | 0.15            | 2.03                         | 0.20            | 0.09           |
|              | Std  | 25.44                  | 2.31                          | 0.73                         | 0.17            | 1.05                         | 0.17            | 0.10           |
|              | Max  | 161.97                 | 11.52                         | 3.88                         | 0.83            | 5.82                         | 0.75            | 0.68           |
| Zarqa        | Min  | 12.63                  | 1.33                          | 0.08                         | 0.01            | 0.47                         | N.D             | N.D            |
|              | Mean | 37.52                  | 5.37                          | 1.44                         | 0.32            | 2.06                         | 0.29            | 0.11           |
|              | Std  | 19.42                  | 2.52                          | 1.25                         | 0.32            | 1.13                         | 0.22            | 0.08           |
|              | Max  | 113.01                 | 11.83                         | 7.55                         | 1.77            | 5.92                         | 0.78            | 0.30           |
| Eilat        | Min  | 5.64                   | N.D                           | N.D                          | 0.01            | 0.40                         | 0.02            | 0.02           |
|              | Mean | 20.56                  | 3.72                          | 0.77                         | 0.30            | 1.54                         | 0.34            | 0.11           |
|              | Std  | 9.60                   | 1.78                          | 0.79                         | 0.49            | 0.85                         | 0.22            | 0.06           |
|              | Max  | 53.65                  | 7.22                          | 4.81                         | 2.78            | 4.88                         | 0.97            | 0.31           |
| W.           | Min  | 10.29                  | 0.85                          | 0.18                         | 0.01            | 0.34                         | 0.01            | N.D            |

|           |      |        |       |      |      |      |      |      |
|-----------|------|--------|-------|------|------|------|------|------|
| Jerusalem | Mean | 25.72  | 4.93  | 1.14 | 0.19 | 1.97 | 0.27 | 0.08 |
|           | Std  | 18.19  | 2.83  | 0.68 | 0.21 | 1.03 | 0.24 | 0.18 |
|           | Max  | 116.62 | 14.15 | 2.99 | 1.05 | 4.69 | 1.13 | 1.22 |
|           | Min  | 13.04  | 1.24  | N.D  | N.D  | 0.38 | 0.02 | N.D  |
| Tel Aviv  | Mean | 32.25  | 5.48  | 1.44 | 0.38 | 2.22 | 0.58 | 0.09 |
|           | Std  | 12.47  | 3.25  | 1.56 | 0.53 | 1.32 | 0.54 | 0.06 |
|           | Max  | 80.65  | 14.90 | 8.14 | 2.39 | 6.79 | 3.09 | 0.31 |
|           | Min  | 7.84   | 0.73  | N.D  | N.D  | 0.03 | N.D  | N.D  |
| Haifa     | Mean | 24.44  | 5.44  | 0.83 | 0.26 | 1.91 | 0.42 | 0.09 |
|           | Std  | 16.98  | 3.28  | 0.64 | 0.26 | 1.15 | 0.28 | 0.09 |
|           | Max  | 106.81 | 14.93 | 3.09 | 0.95 | 5.60 | 1.39 | 0.59 |

---

\*not detected, min=minimum, Std=Standard deviation, Max=Maximum

6 Table S3. Annual average concentrations of each trace metal across eleven sites (unit: microgram per cubic meter).

| Site         | Statistics | Al    | Si     | P     | S     | Cl    | K     | Ca     | Ti    | V     | Mn    | Fe    | Ni    | Cu    | Zn    | Br    | Sr    | Pb    |
|--------------|------------|-------|--------|-------|-------|-------|-------|--------|-------|-------|-------|-------|-------|-------|-------|-------|-------|-------|
| All sites    | Min        | N.D*  | N.D    | N.D   | N.D   | N.D   | N.D   | N.D    | N.D   | N.D   | N.D   | N.D   | N.D   | N.D   | N.D   | N.D   | N.D   | N.D   |
|              | Mean       | 0.445 | 0.932  | 0.071 | 1.770 | 0.178 | 0.267 | 1.131  | 0.041 | 0.005 | 0.007 | 0.450 | 0.001 | 0.004 | 0.031 | 0.012 | 0.003 | 0.072 |
|              | Std        | 0.782 | 1.634  | 0.045 | 0.954 | 0.299 | 0.284 | 1.649  | 0.071 | 0.005 | 0.013 | 0.700 | 0.003 | 0.006 | 0.053 | 0.023 | 0.007 | 0.359 |
|              | Max        | 6.431 | 13.707 | 0.346 | 5.720 | 2.585 | 2.360 | 15.284 | 0.590 | 0.043 | 0.120 | 6.534 | 0.052 | 0.056 | 0.516 | 0.266 | 0.060 | 4.748 |
| E. Jerusalem | Min        | N.D   | N.D    | N.D   | 0.266 | 0.008 | 0.040 | 0.136  | N.D   | N.D   | N.D   | 0.054 | N.D   | N.D   | N.D   | N.D   | N.D   | N.D   |
|              | Mean       | 0.394 | 0.816  | 0.067 | 1.766 | 0.117 | 0.247 | 0.808  | 0.037 | 0.004 | 0.005 | 0.414 | 0.001 | 0.004 | 0.024 | 0.005 | 0.002 | 0.010 |
|              | Std        | 0.758 | 1.551  | 0.037 | 0.905 | 0.162 | 0.316 | 1.367  | 0.072 | 0.003 | 0.012 | 0.704 | 0.001 | 0.009 | 0.037 | 0.006 | 0.006 | 0.017 |
| Hebron       | Max        | 4.857 | 9.852  | 0.150 | 3.973 | 0.726 | 2.020 | 9.577  | 0.470 | 0.015 | 0.077 | 4.672 | 0.005 | 0.056 | 0.270 | 0.025 | 0.038 | 0.072 |
|              | Min        | N.D   | N.D    | N.D   | 0.173 | 0.006 | 0.045 | 0.085  | N.D   | N.D   | N.D   | 0.022 | N.D   | N.D   | N.D   | N.D   | N.D   | N.D   |
|              | Mean       | 0.272 | 0.574  | 0.062 | 1.571 | 0.088 | 0.200 | 0.675  | 0.025 | 0.003 | 0.004 | 0.264 | 0.000 | 0.003 | 0.025 | 0.005 | 0.001 | 0.008 |
| Nablus       | Std        | 0.386 | 0.831  | 0.039 | 0.905 | 0.108 | 0.144 | 0.552  | 0.035 | 0.003 | 0.007 | 0.350 | 0.001 | 0.003 | 0.058 | 0.007 | 0.003 | 0.011 |
|              | Max        | 1.943 | 4.148  | 0.168 | 4.400 | 0.546 | 0.802 | 3.098  | 0.181 | 0.014 | 0.032 | 1.750 | 0.006 | 0.013 | 0.356 | 0.032 | 0.015 | 0.042 |
|              | Min        | N.D   | N.D    | N.D   | 0.273 | 0.010 | 0.078 | 0.060  | N.D   | N.D   | N.D   | 0.052 | N.D   | N.D   | 0.011 | N.D   | N.D   | N.D   |
| Aqaba        | Mean       | 0.330 | 0.684  | 0.074 | 1.791 | 0.135 | 0.253 | 1.017  | 0.031 | 0.005 | 0.004 | 0.352 | 0.001 | 0.003 | 0.044 | 0.005 | 0.002 | 0.009 |
|              | Std        | 0.643 | 1.317  | 0.042 | 0.960 | 0.160 | 0.218 | 0.948  | 0.058 | 0.003 | 0.010 | 0.564 | 0.001 | 0.004 | 0.063 | 0.005 | 0.005 | 0.016 |
|              | Max        | 3.653 | 7.462  | 0.181 | 4.306 | 0.576 | 1.491 | 6.517  | 0.334 | 0.014 | 0.050 | 3.200 | 0.007 | 0.017 | 0.423 | 0.021 | 0.023 | 0.085 |
| Rahma        | Min        | N.D   | N.D    | N.D   | N.D   | N.D   | N.D   | N.D    | N.D   | N.D   | N.D   | N.D   | N.D   | N.D   | N.D   | N.D   | N.D   | N.D   |
|              | Mean       | 0.552 | 1.183  | 0.080 | 1.481 | 0.080 | 0.278 | 1.159  | 0.051 | 0.004 | 0.007 | 0.480 | 0.000 | 0.001 | 0.016 | 0.013 | 0.005 | 0.019 |
|              | Std        | 0.848 | 1.789  | 0.065 | 0.755 | 0.180 | 0.288 | 1.808  | 0.074 | 0.004 | 0.014 | 0.735 | 0.001 | 0.002 | 0.011 | 0.014 | 0.009 | 0.027 |
| Amman        | Max        | 5.080 | 10.847 | 0.346 | 3.781 | 0.584 | 1.944 | 11.455 | 0.446 | 0.017 | 0.083 | 4.474 | 0.005 | 0.010 | 0.042 | 0.049 | 0.045 | 0.154 |
|              | Min        | 0.037 | N.D    | N.D   | 0.253 | N.D   | 0.074 | 0.110  | N.D   | 0.001 | N.D   | 0.034 | N.D   | N.D   | N.D   | N.D   | N.D   | N.D   |
|              | Mean       | 0.618 | 1.270  | 0.075 | 1.641 | 0.117 | 0.311 | 1.176  | 0.053 | 0.005 | 0.007 | 0.511 | 0.001 | 0.001 | 0.019 | 0.013 | 0.005 | 0.013 |
| Zarqa        | Std        | 1.043 | 2.118  | 0.041 | 0.792 | 0.181 | 0.342 | 2.096  | 0.091 | 0.004 | 0.015 | 0.866 | 0.001 | 0.002 | 0.015 | 0.012 | 0.010 | 0.025 |
|              | Max        | 6.431 | 13.138 | 0.168 | 3.973 | 0.671 | 2.360 | 14.173 | 0.570 | 0.020 | 0.097 | 5.539 | 0.005 | 0.009 | 0.078 | 0.047 | 0.060 | 0.157 |
|              | Min        | 0.030 | N.D    | N.D   | 0.575 | 0.015 | 0.050 | 0.075  | N.D   | N.D   | N.D   | 0.020 | N.D   | N.D   | 0.004 | 0.005 | N.D   | N.D   |
| Zarqa        | Mean       | 0.772 | 1.633  | 0.073 | 1.933 | 0.220 | 0.405 | 2.842  | 0.075 | 0.005 | 0.013 | 0.790 | 0.001 | 0.005 | 0.026 | 0.033 | 0.007 | 0.085 |
|              | Std        | 1.189 | 2.593  | 0.039 | 0.878 | 0.256 | 0.418 | 2.756  | 0.113 | 0.004 | 0.022 | 1.149 | 0.002 | 0.006 | 0.018 | 0.045 | 0.011 | 0.125 |
| Zarqa        | Max        | 5.972 | 13.707 | 0.193 | 4.386 | 1.025 | 2.359 | 15.284 | 0.590 | 0.024 | 0.120 | 6.534 | 0.013 | 0.033 | 0.091 | 0.266 | 0.058 | 0.488 |
|              | Min        | 0.037 | 0.028  | N.D   | 0.363 | 0.009 | 0.057 | 0.177  | N.D   | N.D   | N.D   | 0.034 | N.D   | N.D   | 0.004 | N.D   | N.D   | N.D   |

|                 |      |       |        |       |       |       |       |        |       |       |       |       |       |       |       |       |       |       |
|-----------------|------|-------|--------|-------|-------|-------|-------|--------|-------|-------|-------|-------|-------|-------|-------|-------|-------|-------|
|                 | Mean | 0.525 | 1.085  | 0.068 | 1.838 | 0.227 | 0.303 | 1.690  | 0.047 | 0.006 | 0.012 | 0.517 | 0.001 | 0.005 | 0.086 | 0.031 | 0.003 | 0.593 |
|                 | Std  | 0.879 | 1.814  | 0.043 | 0.945 | 0.302 | 0.294 | 1.715  | 0.076 | 0.005 | 0.015 | 0.747 | 0.002 | 0.007 | 0.112 | 0.040 | 0.007 | 1.046 |
|                 | Max  | 5.376 | 10.960 | 0.183 | 4.695 | 1.830 | 2.046 | 10.996 | 0.464 | 0.016 | 0.074 | 4.563 | 0.007 | 0.025 | 0.516 | 0.255 | 0.042 | 4.748 |
|                 | Min  | N.D   | 0.053  | N.D   | 0.334 | 0.007 | 0.060 | 0.069  | N.D   | N.D   | N.D   | 0.056 | N.D   | N.D   | N.D   | N.D   | N.D   | N.D   |
| Eilat           | Mean | 0.419 | 0.880  | 0.063 | 1.549 | 0.153 | 0.238 | 0.908  | 0.038 | 0.005 | 0.006 | 0.386 | 0.002 | 0.002 | 0.020 | 0.010 | 0.003 | 0.012 |
|                 | Std  | 0.494 | 1.023  | 0.034 | 0.742 | 0.190 | 0.147 | 0.887  | 0.044 | 0.003 | 0.008 | 0.422 | 0.002 | 0.003 | 0.016 | 0.011 | 0.006 | 0.026 |
|                 | Max  | 2.074 | 4.476  | 0.141 | 3.809 | 0.678 | 0.641 | 4.354  | 0.206 | 0.015 | 0.033 | 2.006 | 0.006 | 0.013 | 0.084 | 0.042 | 0.025 | 0.145 |
|                 | Min  | N.D   | N.D    | N.D   | 0.238 | N.D   | 0.046 | 0.083  | N.D   | N.D   | N.D   | 0.034 | N.D   | N.D   | N.D   | N.D   | N.D   | N.D   |
| W.<br>Jerusalem | Mean | 0.400 | 0.841  | 0.069 | 1.830 | 0.117 | 0.243 | 0.706  | 0.037 | 0.004 | 0.005 | 0.402 | 0.001 | 0.003 | 0.024 | 0.004 | 0.002 | 0.010 |
|                 | Std  | 0.747 | 1.522  | 0.039 | 0.952 | 0.197 | 0.331 | 1.207  | 0.067 | 0.003 | 0.011 | 0.655 | 0.001 | 0.004 | 0.053 | 0.007 | 0.006 | 0.019 |
|                 | Max  | 4.741 | 9.540  | 0.176 | 4.680 | 0.922 | 1.853 | 8.440  | 0.424 | 0.014 | 0.061 | 4.155 | 0.005 | 0.018 | 0.403 | 0.042 | 0.034 | 0.109 |
|                 | Min  | N.D   | N.D    | N.D   | N.D   | 0.018 | 0.073 | 0.117  | N.D   | N.D   | N.D   | 0.080 | N.D   | N.D   | 0.008 | N.D   | N.D   | N.D   |
| Tel Aviv        | Mean | 0.332 | 0.707  | 0.076 | 2.080 | 0.497 | 0.256 | 0.861  | 0.035 | 0.008 | 0.007 | 0.524 | 0.002 | 0.008 | 0.032 | 0.004 | 0.003 | 0.010 |
|                 | Std  | 0.374 | 0.767  | 0.052 | 1.261 | 0.626 | 0.163 | 0.705  | 0.034 | 0.005 | 0.008 | 0.356 | 0.002 | 0.011 | 0.017 | 0.004 | 0.005 | 0.012 |
|                 | Max  | 1.822 | 3.593  | 0.198 | 5.720 | 2.585 | 0.775 | 4.006  | 0.175 | 0.023 | 0.026 | 1.719 | 0.007 | 0.043 | 0.089 | 0.020 | 0.017 | 0.058 |
|                 | Min  | N.D   | N.D    | N.D   | 0.309 | N.D   | 0.033 | 0.064  | N.D   | N.D   | N.D   | 0.026 | N.D   | N.D   | N.D   | N.D   | N.D   | N.D   |
| Haifa           | Mean | 0.274 | 0.572  | 0.071 | 1.881 | 0.177 | 0.189 | 0.464  | 0.025 | 0.009 | 0.002 | 0.280 | 0.005 | 0.004 | 0.019 | 0.002 | 0.001 | 0.010 |
|                 | Std  | 0.654 | 1.336  | 0.048 | 1.103 | 0.265 | 0.256 | 1.108  | 0.059 | 0.007 | 0.009 | 0.565 | 0.008 | 0.007 | 0.037 | 0.004 | 0.005 | 0.020 |
|                 | Max  | 4.594 | 9.337  | 0.225 | 5.497 | 1.046 | 1.770 | 8.032  | 0.409 | 0.043 | 0.061 | 3.974 | 0.052 | 0.046 | 0.240 | 0.025 | 0.031 | 0.110 |

\*not detected, min=minimum, Std=Standard deviation, Max=Maximum

8 Table S4. Inter-correlation among each pair of ion for each site

| Site                         |                              |                              | SO <sub>4</sub> <sup>2-</sup> | NO <sub>3</sub> <sup>-</sup> | Cl <sup>-</sup> | NH <sub>4</sub> <sup>+</sup> | Na <sup>+</sup> |  |
|------------------------------|------------------------------|------------------------------|-------------------------------|------------------------------|-----------------|------------------------------|-----------------|--|
| E.<br>Jerusalem              | NO <sub>3</sub> <sup>-</sup> | Pearson Correlation          | -0.06                         |                              |                 |                              |                 |  |
|                              |                              | p-value                      | 0.67                          |                              |                 |                              |                 |  |
|                              | Cl <sup>-</sup>              | Pearson Correlation          | -0.37                         | 0.37                         |                 |                              |                 |  |
|                              |                              | p-value                      | 0.01                          | 0.01                         |                 |                              |                 |  |
|                              | NH <sub>4</sub> <sup>+</sup> | Pearson Correlation          | 0.91                          | -0.01                        | -0.32           |                              |                 |  |
|                              |                              | p-value                      | 0.00                          | 0.92                         | 0.02            |                              |                 |  |
|                              | Na <sup>+</sup>              | Pearson Correlation          | 0.13                          | 0.26                         | 0.30            | -0.14                        |                 |  |
|                              |                              | p-value                      | 0.40                          | 0.07                         | 0.04            | 0.36                         |                 |  |
|                              | K <sup>+</sup>               | Pearson Correlation          | 0.19                          | 0.29                         | 0.14            | -0.03                        | 0.30            |  |
|                              |                              | p-value                      | 0.19                          | 0.04                         | 0.34            | 0.82                         | 0.04            |  |
|                              | Palestine<br>Hebron          | NO <sub>3</sub> <sup>-</sup> | Pearson Correlation           | 0.21                         |                 |                              |                 |  |
|                              |                              |                              | p-value                       | 0.12                         |                 |                              |                 |  |
| Cl <sup>-</sup>              |                              | Pearson Correlation          | -0.36                         | 0.37                         |                 |                              |                 |  |
|                              |                              | p-value                      | 0.01                          | 0.01                         |                 |                              |                 |  |
| NH <sub>4</sub> <sup>+</sup> |                              | Pearson Correlation          | 0.88                          | 0.39                         | -0.29           |                              |                 |  |
|                              |                              | p-value                      | 0.00                          | 0.00                         | 0.04            |                              |                 |  |
| Na <sup>+</sup>              |                              | Pearson Correlation          | -0.23                         | 0.20                         | 0.43            | -0.18                        |                 |  |
|                              |                              | p-value                      | 0.11                          | 0.16                         | 0.00            | 0.21                         |                 |  |
| K <sup>+</sup>               |                              | Pearson Correlation          | -0.09                         | 0.06                         | 0.07            | -0.13                        | 0.39            |  |
|                              |                              | p-value                      | 0.53                          | 0.69                         | 0.63            | 0.37                         | 0.01            |  |
| Noblus                       |                              | NO <sub>3</sub> <sup>-</sup> | Pearson Correlation           | 0.08                         |                 |                              |                 |  |
|                              |                              |                              | p-value                       | 0.54                         |                 |                              |                 |  |
|                              | Cl <sup>-</sup>              | Pearson Correlation          | -0.35                         | 0.44                         |                 |                              |                 |  |
|                              |                              | p-value                      | 0.01                          | 0.00                         |                 |                              |                 |  |
|                              | NH <sub>4</sub> <sup>+</sup> | Pearson Correlation          | 0.93                          | 0.05                         | -0.30           |                              |                 |  |
|                              |                              | p-value                      | 0.00                          | 0.71                         | 0.02            |                              |                 |  |
|                              | Na <sup>+</sup>              | Pearson Correlation          | 0.04                          | 0.27                         | 0.44            | -0.15                        |                 |  |
|                              |                              | p-value                      | 0.77                          | 0.06                         | 0.00            | 0.27                         |                 |  |
|                              | K <sup>+</sup>               | Pearson Correlation          | 0.39                          | 0.39                         | -0.06           | 0.17                         | 0.31            |  |
|                              |                              | p-value                      | 0.00                          | 0.00                         | 0.68            | 0.22                         | 0.02            |  |

9

10

11 Table S4. Continued

| Site                         |                              |                              | SO <sub>4</sub> <sup>2-</sup> | NO <sub>3</sub> <sup>-</sup> | Cl <sup>-</sup> | NH <sub>4</sub> <sup>+</sup> | Na <sup>+</sup> |  |
|------------------------------|------------------------------|------------------------------|-------------------------------|------------------------------|-----------------|------------------------------|-----------------|--|
| Jordan                       | Aqaba                        | NO <sub>3</sub> <sup>-</sup> | Pearson Correlation           | 0.32                         |                 |                              |                 |  |
|                              |                              |                              | p-value                       | 0.02                         |                 |                              |                 |  |
|                              |                              | Cl <sup>-</sup>              | Pearson Correlation           | -0.20                        | 0.24            |                              |                 |  |
|                              |                              |                              | p-value                       | 0.16                         | 0.08            |                              |                 |  |
|                              |                              | NH <sub>4</sub> <sup>+</sup> | Pearson Correlation           | 0.83                         | 0.44            | -0.23                        |                 |  |
|                              |                              |                              | p-value                       | 0.00                         | 0.00            | 0.11                         |                 |  |
|                              | Na <sup>+</sup>              | Pearson Correlation          | -0.12                         | 0.24                         | 0.75            | -0.29                        |                 |  |
|                              |                              | p-value                      | 0.39                          | 0.09                         | 0.00            | 0.04                         |                 |  |
|                              | K <sup>+</sup>               | Pearson Correlation          | 0.41                          | 0.55                         | -0.06           | 0.32                         | 0.00            |  |
|                              |                              | p-value                      | 0.00                          | 0.00                         | 0.66            | 0.02                         | 0.98            |  |
|                              | Rahma                        | NO <sub>3</sub> <sup>-</sup> | Pearson Correlation           | 0.16                         |                 |                              |                 |  |
|                              |                              |                              | p-value                       | 0.27                         |                 |                              |                 |  |
| Cl <sup>-</sup>              |                              | Pearson Correlation          | -0.40                         | 0.33                         |                 |                              |                 |  |
|                              |                              | p-value                      | 0.01                          | 0.03                         |                 |                              |                 |  |
| NH <sub>4</sub> <sup>+</sup> |                              | Pearson Correlation          | 0.93                          | 0.28                         | -0.49           |                              |                 |  |
|                              |                              | p-value                      | 0.00                          | 0.04                         | 0.00            |                              |                 |  |
| Na <sup>+</sup>              | Pearson Correlation          | -0.22                        | 0.19                          | 0.84                         | -0.38           |                              |                 |  |
|                              | p-value                      | 0.14                         | 0.21                          | 0.00                         | 0.01            |                              |                 |  |
| K <sup>+</sup>               | Pearson Correlation          | 0.27                         | 0.47                          | -0.02                        | 0.30            | -0.10                        |                 |  |
|                              | p-value                      | 0.06                         | 0.00                          | 0.92                         | 0.03            | 0.51                         |                 |  |
| Amman                        | NO <sub>3</sub> <sup>-</sup> | Pearson Correlation          | 0.54                          |                              |                 |                              |                 |  |
|                              |                              | p-value                      | 0.00                          |                              |                 |                              |                 |  |
|                              | Cl <sup>-</sup>              | Pearson Correlation          | -0.03                         | 0.47                         |                 |                              |                 |  |
|                              |                              | p-value                      | 0.80                          | 0.00                         |                 |                              |                 |  |
|                              | NH <sub>4</sub> <sup>+</sup> | Pearson Correlation          | 0.88                          | 0.65                         | 0.06            |                              |                 |  |
|                              |                              | p-value                      | 0.00                          | 0.00                         | 0.64            |                              |                 |  |
|                              | Na <sup>+</sup>              | Pearson Correlation          | -0.11                         | 0.15                         | 0.51            | -0.26                        |                 |  |
|                              |                              | p-value                      | 0.46                          | 0.31                         | 0.00            | 0.06                         |                 |  |
|                              | K <sup>+</sup>               | Pearson Correlation          | 0.18                          | 0.04                         | 0.00            | -0.05                        | 0.26            |  |
|                              |                              | p-value                      | 0.19                          | 0.78                         | 0.98            | 0.70                         | 0.07            |  |
|                              | Zarqa                        | NO <sub>3</sub> <sup>-</sup> | Pearson Correlation           | 0.35                         |                 |                              |                 |  |
|                              |                              |                              | p-value                       | 0.01                         |                 |                              |                 |  |
| Cl <sup>-</sup>              |                              | Pearson Correlation          | 0.08                          | 0.72                         |                 |                              |                 |  |
|                              |                              | p-value                      | 0.55                          | 0.00                         |                 |                              |                 |  |
| NH <sub>4</sub> <sup>+</sup> |                              | Pearson Correlation          | 0.89                          | 0.58                         | 0.28            |                              |                 |  |
|                              |                              | p-value                      | 0.00                          | 0.00                         | 0.04            |                              |                 |  |
| Na <sup>+</sup>              |                              | Pearson Correlation          | -0.25                         | 0.08                         | 0.22            | -0.39                        |                 |  |
|                              |                              | p-value                      | 0.09                          | 0.57                         | 0.13            | 0.01                         |                 |  |
| K <sup>+</sup>               |                              | Pearson Correlation          | 0.06                          | -0.17                        | -0.09           | -0.03                        | 0.09            |  |
|                              |                              | p-value                      | 0.66                          | 0.24                         | 0.52            | 0.81                         | 0.56            |  |

12

13

14 Table S4. Continued

| Site                                |                                                  |                                                  | SO <sub>4</sub> <sup>2-</sup> | NO <sub>3</sub> <sup>-</sup> | Cl <sup>-</sup> | NH <sub>4</sub> <sup>+</sup> | Na <sup>+</sup> |
|-------------------------------------|--------------------------------------------------|--------------------------------------------------|-------------------------------|------------------------------|-----------------|------------------------------|-----------------|
| Israel                              | Eilat                                            | NO <sub>3</sub> <sup>-</sup> Pearson Correlation | -0.34                         |                              |                 |                              |                 |
|                                     |                                                  | p-value                                          | 0.03                          |                              |                 |                              |                 |
|                                     |                                                  | Cl <sup>-</sup> Pearson Correlation              | -0.38                         | 0.23                         |                 |                              |                 |
|                                     |                                                  | p-value                                          | 0.03                          | 0.20                         |                 |                              |                 |
|                                     |                                                  | NH <sub>4</sub> <sup>+</sup> Pearson Correlation | 0.48                          | 0.51                         | -0.10           |                              |                 |
|                                     |                                                  | p-value                                          | 0.00                          | 0.00                         | 0.57            |                              |                 |
|                                     | Na <sup>+</sup> Pearson Correlation              | -0.22                                            | 0.40                          | 0.35                         | -0.13           |                              |                 |
|                                     | p-value                                          | 0.17                                             | 0.01                          | 0.05                         | 0.44            |                              |                 |
|                                     | K <sup>+</sup> Pearson Correlation               | -0.07                                            | 0.58                          | 0.14                         | 0.44            | 0.10                         |                 |
|                                     | p-value                                          | 0.66                                             | 0.00                          | 0.43                         | 0.00            | 0.54                         |                 |
|                                     | W. Jerusalem                                     | NO <sub>3</sub> <sup>-</sup> Pearson Correlation | 0.20                          |                              |                 |                              |                 |
|                                     |                                                  | p-value                                          | 0.15                          |                              |                 |                              |                 |
|                                     |                                                  | Cl <sup>-</sup> Pearson Correlation              | -0.03                         | 0.42                         |                 |                              |                 |
|                                     |                                                  | p-value                                          | 0.84                          | 0.00                         |                 |                              |                 |
|                                     |                                                  | NH <sub>4</sub> <sup>+</sup> Pearson Correlation | 0.92                          | 0.16                         | -0.22           |                              |                 |
|                                     |                                                  | p-value                                          | 0.00                          | 0.25                         | 0.12            |                              |                 |
|                                     | Na <sup>+</sup> Pearson Correlation              | 0.05                                             | 0.44                          | 0.64                         | -0.20           |                              |                 |
|                                     | p-value                                          | 0.74                                             | 0.00                          | 0.00                         | 0.16            |                              |                 |
| Tel Aviv                            | NO <sub>3</sub> <sup>-</sup> Pearson Correlation | 0.08                                             |                               |                              |                 |                              |                 |
|                                     | p-value                                          | 0.55                                             |                               |                              |                 |                              |                 |
|                                     | Cl <sup>-</sup> Pearson Correlation              | -0.19                                            | 0.41                          |                              |                 |                              |                 |
|                                     | p-value                                          | 0.18                                             | 0.00                          |                              |                 |                              |                 |
|                                     | NH <sub>4</sub> <sup>+</sup> Pearson Correlation | 0.90                                             | 0.35                          | -0.21                        |                 |                              |                 |
|                                     | p-value                                          | 0.00                                             | 0.01                          | 0.12                         |                 |                              |                 |
| Na <sup>+</sup> Pearson Correlation | 0.10                                             | 0.42                                             | 0.91                          | 0.03                         |                 |                              |                 |
| p-value                             | 0.45                                             | 0.00                                             | 0.00                          | 0.83                         |                 |                              |                 |
| Haifa                               | K <sup>+</sup> Pearson Correlation               | 0.39                                             | 0.49                          | 0.34                         | 0.40            | 0.45                         |                 |
|                                     | p-value                                          | 0.00                                             | 0.00                          | 0.01                         | 0.00            | 0.00                         |                 |
|                                     | NO <sub>3</sub> <sup>-</sup> Pearson Correlation | 0.06                                             |                               |                              |                 |                              |                 |
|                                     | p-value                                          | 0.67                                             |                               |                              |                 |                              |                 |
|                                     | Cl <sup>-</sup> Pearson Correlation              | -0.27                                            | 0.17                          |                              |                 |                              |                 |
|                                     | p-value                                          | 0.07                                             | 0.26                          |                              |                 |                              |                 |
| Haifa                               | NH <sub>4</sub> <sup>+</sup> Pearson Correlation | 0.93                                             | 0.09                          | -0.44                        |                 |                              |                 |
|                                     | p-value                                          | 0.00                                             | 0.51                          | 0.00                         |                 |                              |                 |
|                                     | Na <sup>+</sup> Pearson Correlation              | 0.20                                             | 0.36                          | 0.63                         | 0.13            |                              |                 |
|                                     | p-value                                          | 0.15                                             | 0.01                          | 0.00                         | 0.35            |                              |                 |
|                                     | K <sup>+</sup> Pearson Correlation               | 0.52                                             | 0.42                          | 0.09                         | 0.52            | 0.44                         |                 |
|                                     | p-value                                          | 0.00                                             | 0.00                          | 0.58                         | 0.00            | 0.00                         |                 |



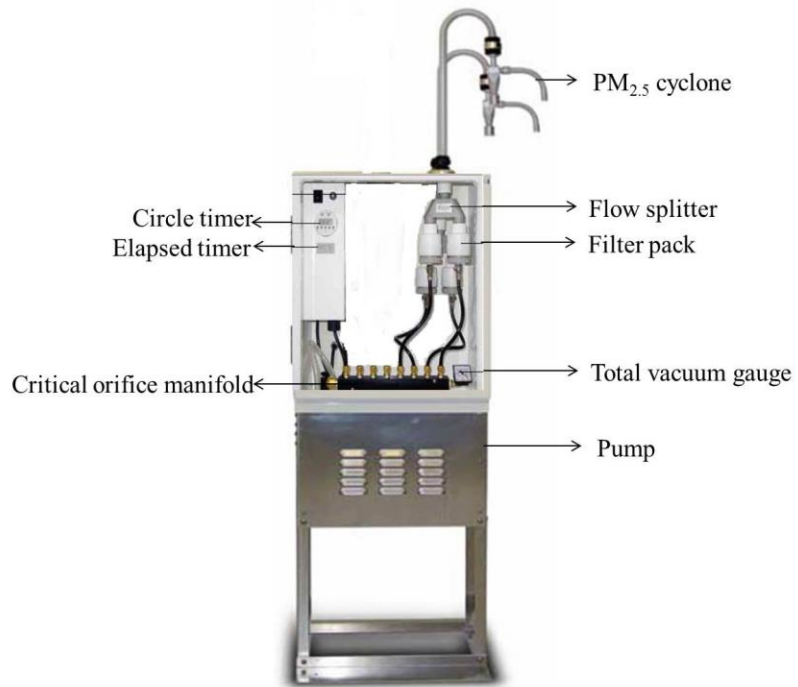

16

17 **Fig. S1.** PM<sub>2.5</sub> sampling system modified from URG-3000ABC (Chapel Hill, NC, USA;

18 [www.urgcorp.com](http://www.urgcorp.com)).

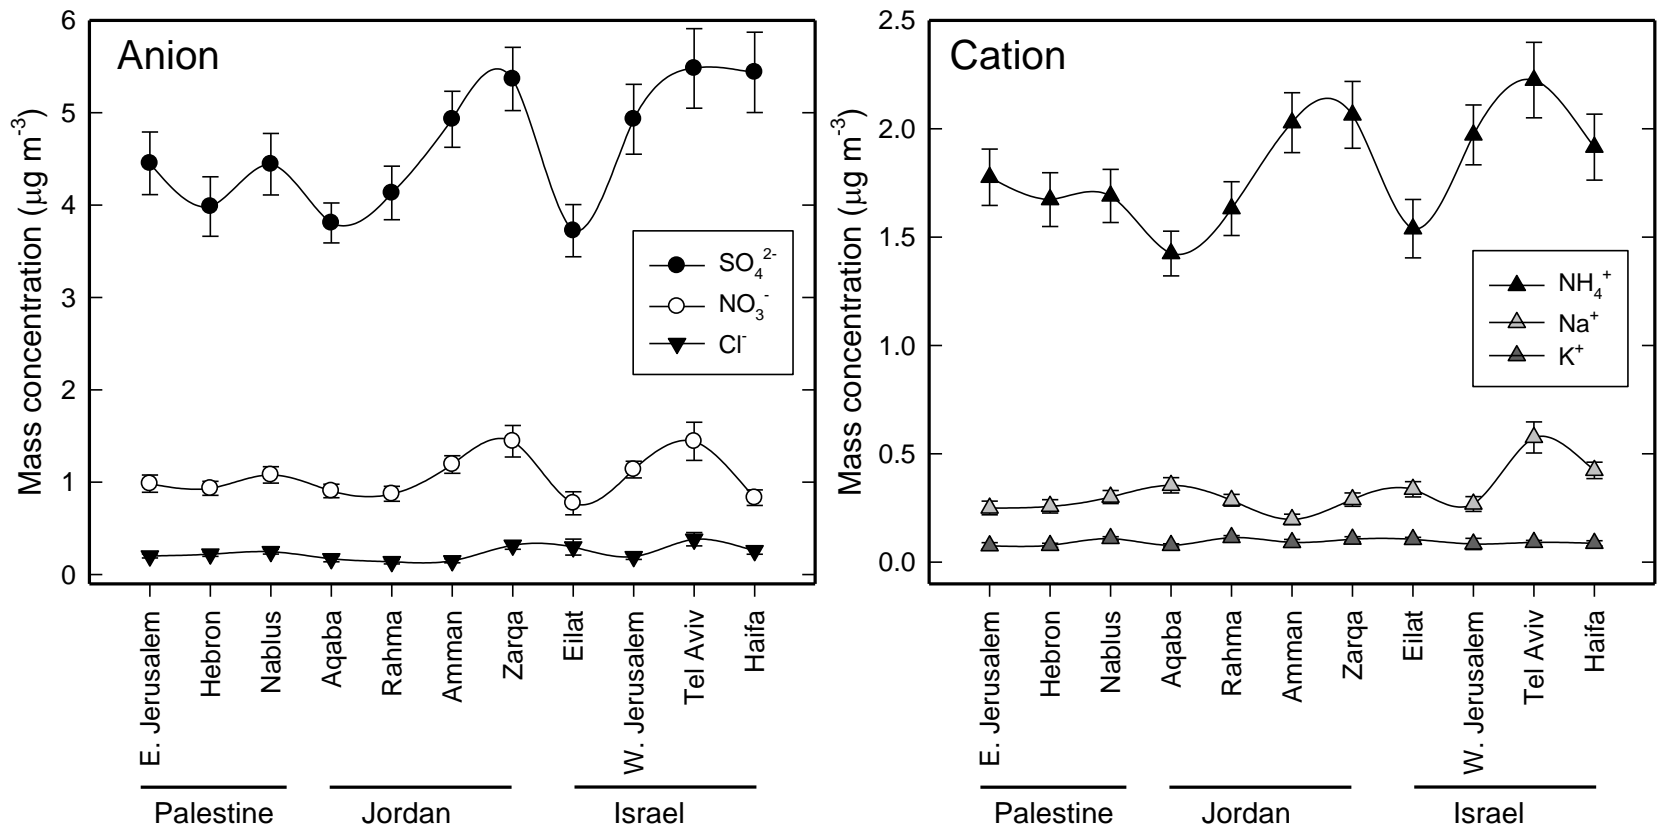

19

20 **Fig. S2.** Annual trends for inorganic water soluble ions at each site.

21

22

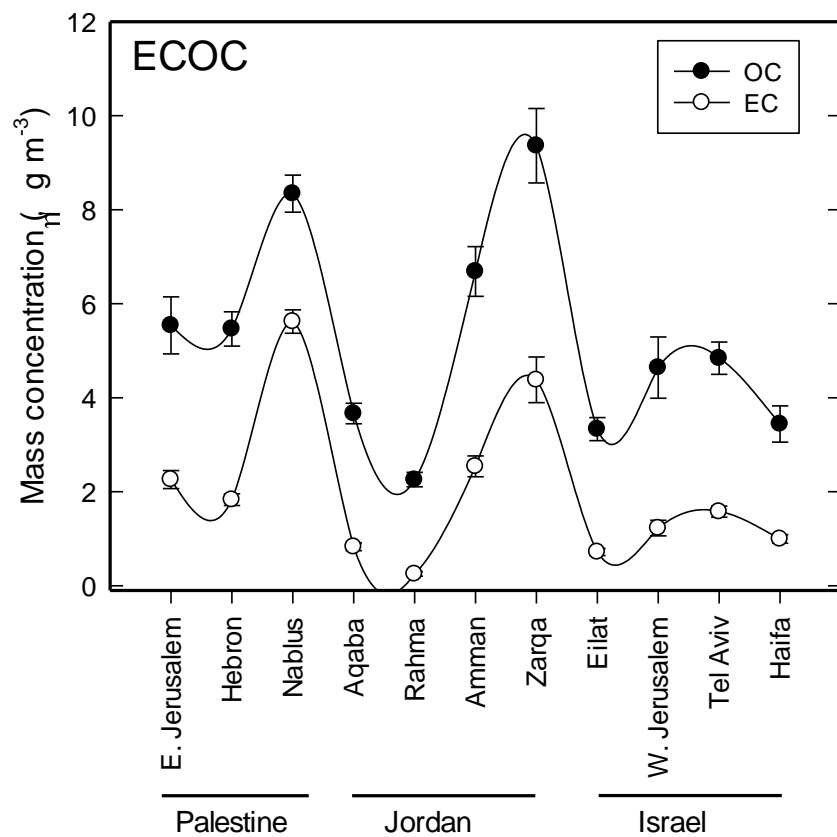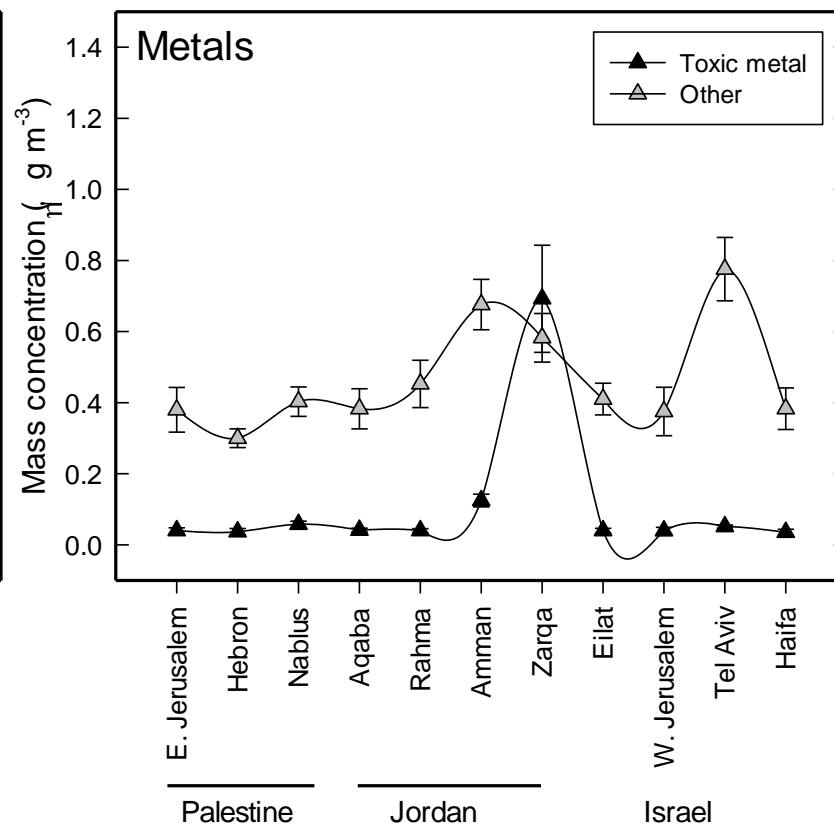

23

24 **Fig. S3.** Annual trends for ECOC and metals at each site.

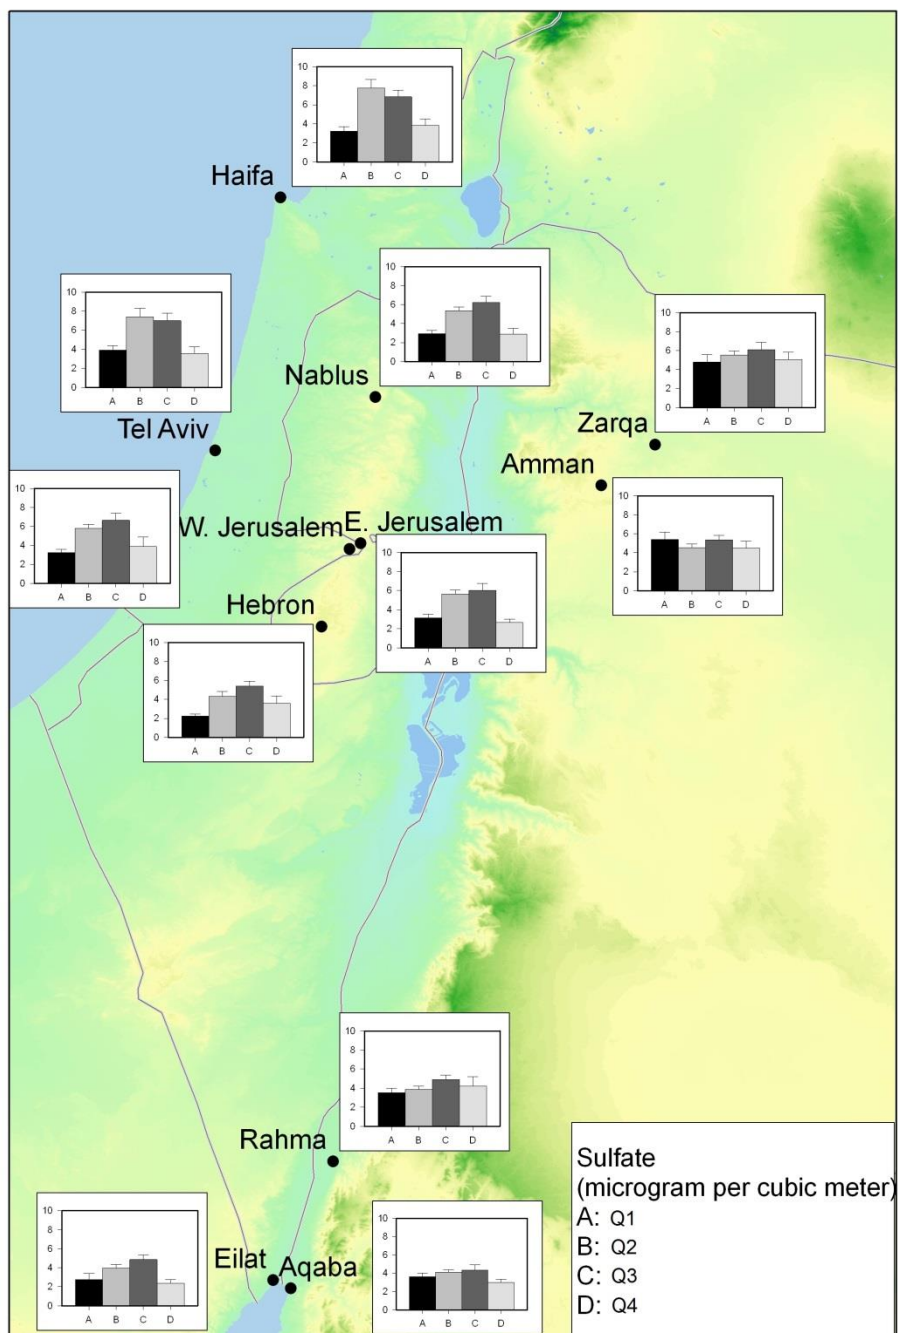

25

26 **Fig. S4.** Spatial and seasonal trends of PM<sub>2.5</sub> sulfate concentrations at each site.

27

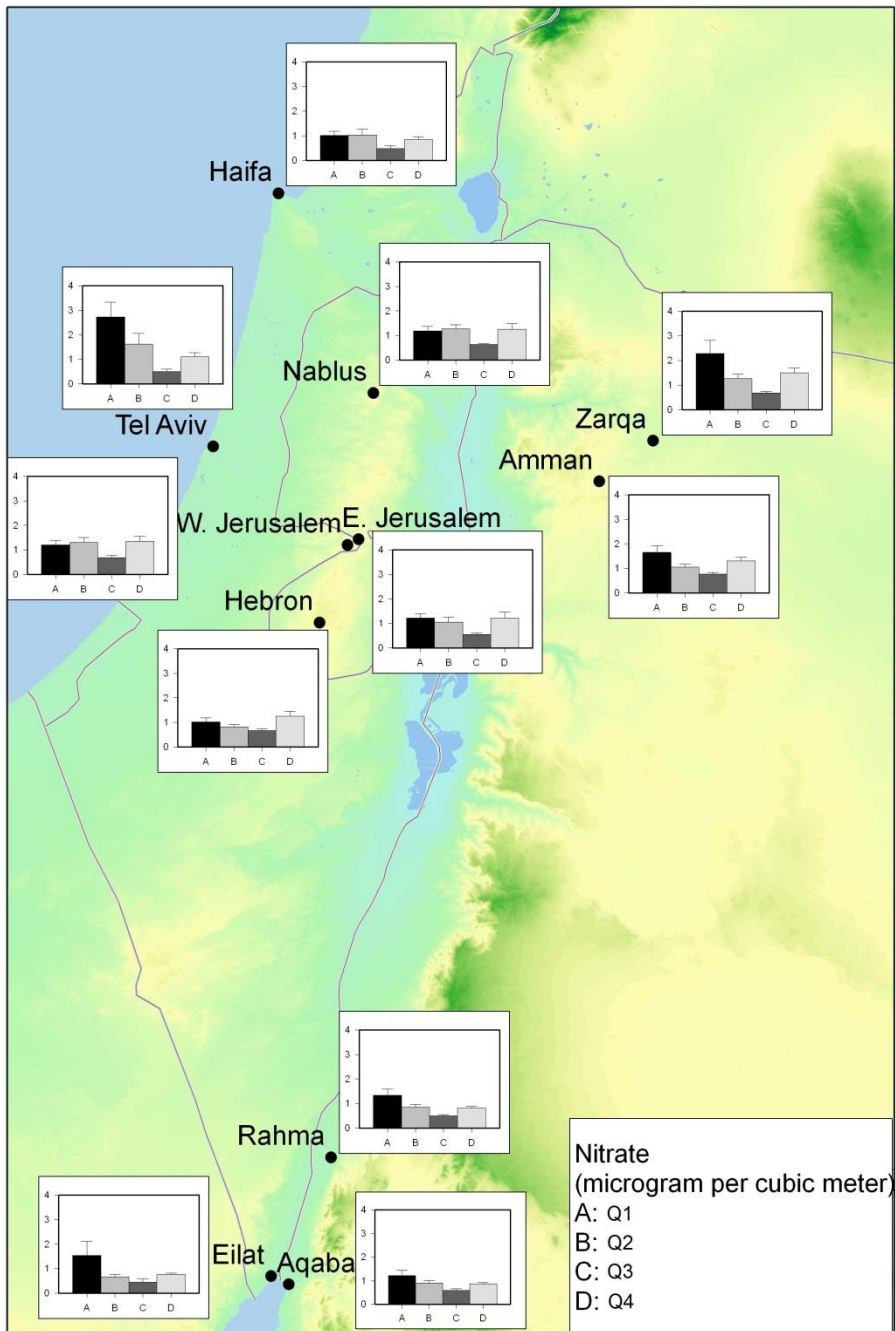

28

29 **Fig. S5.** Spatial and seasonal trends of PM<sub>2.5</sub> nitrate concentrations at each site.

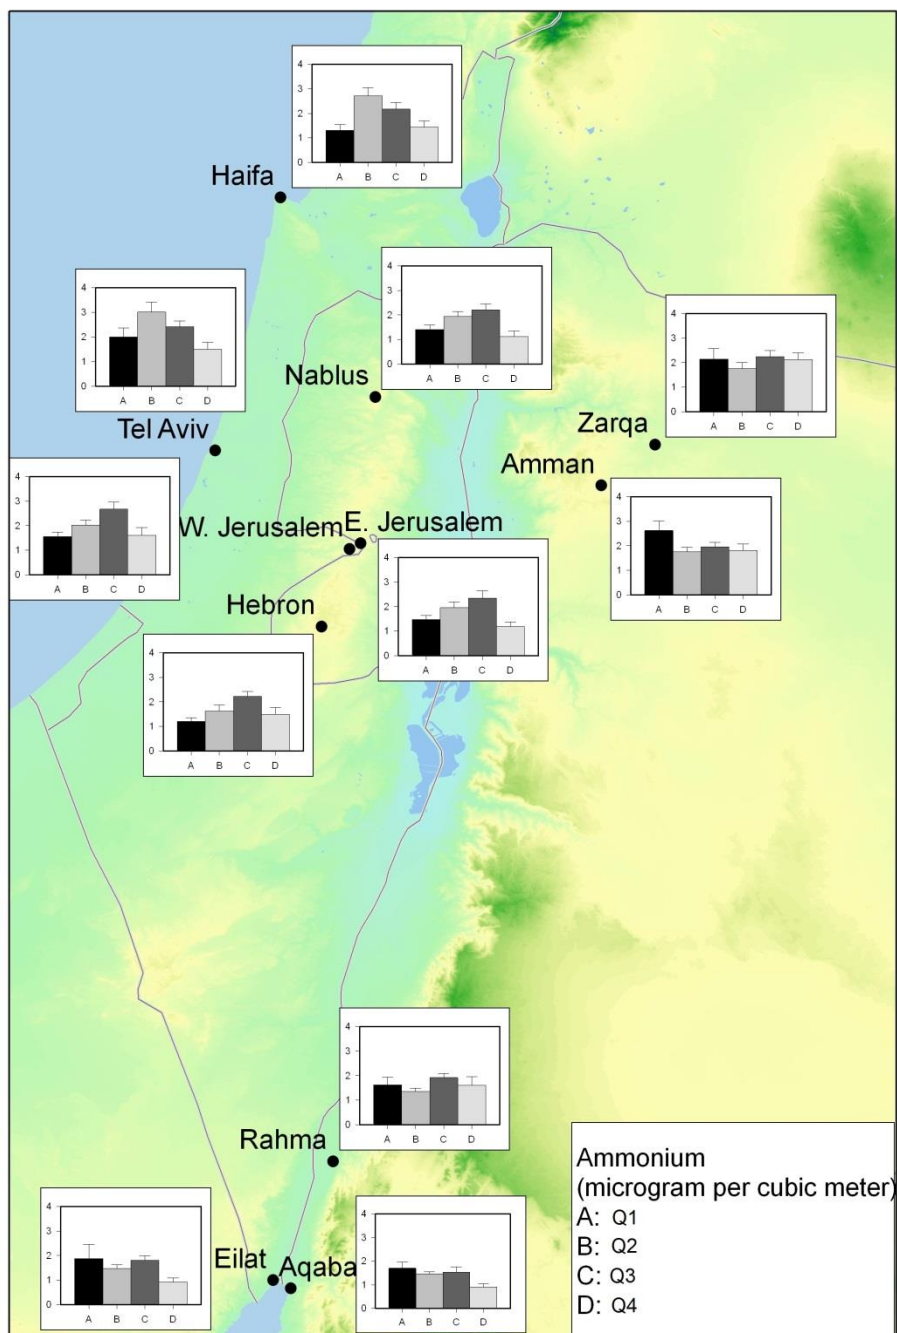

30

31 **Fig. S6.** Spatial and seasonal trends of PM<sub>2.5</sub> ammonium concentrations at each site.

32
